# Supplementary material for: Deletion of exon 4 in LAMA2 is the most frequent mutation in Chinese patients with laminin α2-related muscular dystrophy
Source: PubMed Central journal article supplement (PMC6177444; doi:10.1038/s41598-018-33098-3), 2018-10-09
Supplement: 41598_2018_33098_MOESM1_ESM.pdf [file 41598_2018_33098_MOESM1_ESM.pdf]

## Supplementary Material

### **Deletion of exon 4 in *LAMA2* is the most frequent mutation in Chinese patients with laminin $\alpha$ 2-related muscular dystrophy**

Lin Ge<sup>1,8</sup>, Aijie Liu<sup>1,8</sup>, Kai Gao<sup>1,8</sup>, Renqian Du<sup>2</sup>, Juan Ding<sup>1,8</sup>, Bing Mao<sup>3</sup>, Ying Hua<sup>4</sup>, Xiaoli Zhang<sup>5</sup>, Dandan Tan<sup>1,8</sup>, Haipo Yang<sup>1,8</sup>, Xiaona Fu<sup>1,8</sup>, Yanbin Fan<sup>1,8</sup>, Ling Zhang<sup>2</sup>, Shujuan Song<sup>6</sup>, Jian Wu<sup>7</sup>, Feng Zhang<sup>2</sup>, Yuwu Jiang<sup>1,8</sup>, Xiru Wu<sup>1,8</sup> & Hui Xiong<sup>1,8\*</sup>

<sup>1</sup>Department of Pediatrics, Peking University First Hospital, Beijing 100034, China.

<sup>2</sup>Obstetrics and Gynecology Hospital, Institute of Reproduction and Development, Fudan University, Shanghai 200011, China. <sup>3</sup>Department of Neurology, Wuhan

Children's Hospital, Wuhan, Hubei 430015, China. <sup>4</sup>Department of Pediatrics, Wuxi Children's Hospital, Wuxi, Jiangsu 214023, China. <sup>5</sup>Department of Pediatrics, The

Third Affiliated Hospital of Zhengzhou University, Zhengzhou, Henan 450052,

China. <sup>6</sup>Department of Medical Genetics, School of Basic Medical Sciences, Peking University, Beijing 100191, China. <sup>7</sup>MyGenostics, Inc., Beijing 101318, China.

<sup>8</sup>Beijing Key Laboratory of Molecular Diagnosis and Study on Pediatric Genetic Diseases, Beijing 100034, China.

\*Correspondence and requests for materials should be addressed to H.X. (Department of Pediatrics, Peking University First Hospital, No. 1 Xi'an Men Street, West District, Beijing 100034, P. R. China. Tel: +86 10 83573238; Fax: +86 10 66530532; E-mail:

[xh\\_bjbj@163.com](mailto:xh_bjbj@163.com).)

## Supplemental material

P1: *LAMA2* Exon1 deletion

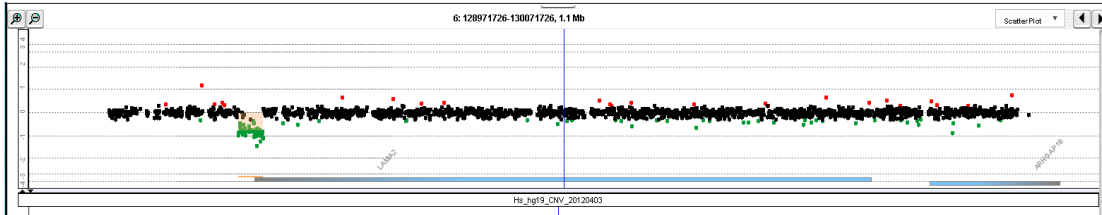

P3: *LAMA2* Exon2-3 deletion

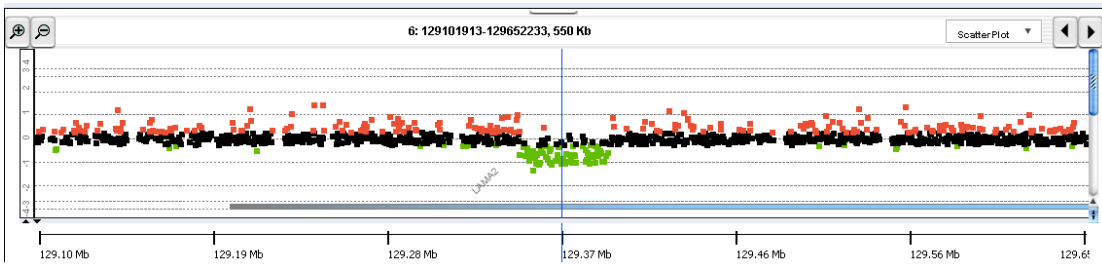

P4: *LAMA2* Exon2-9 deletion

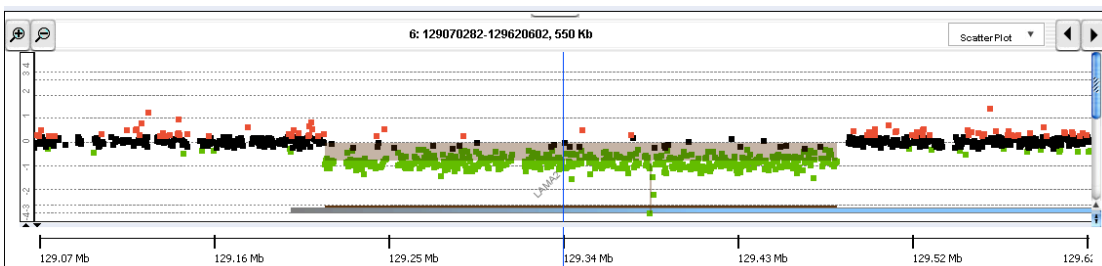

P6: *LAMA2* Exon3-4 deletion

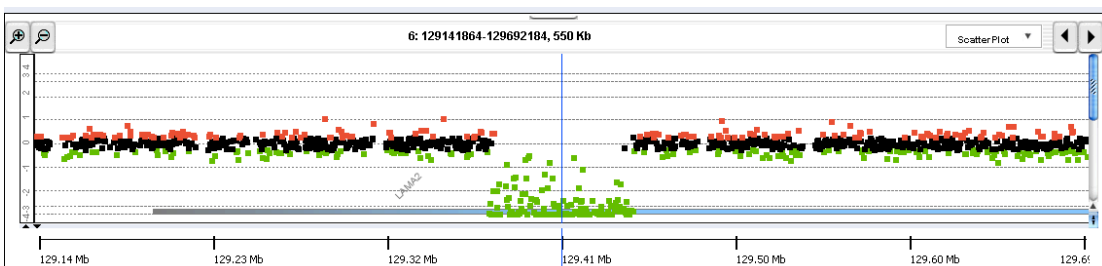

P7: *LAMA2* Exon4 deletion

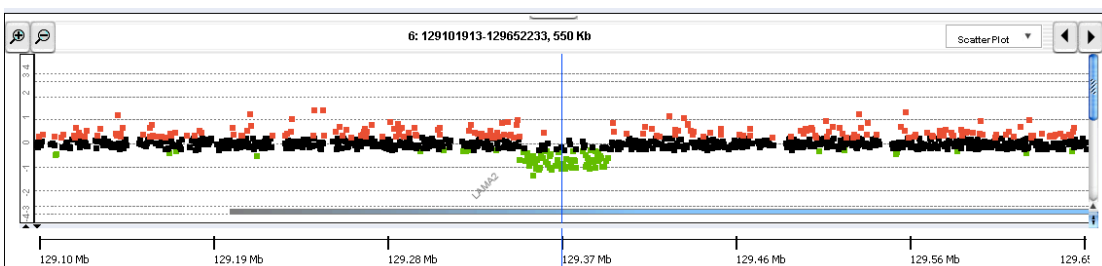

P8: *LAMA2* Exon4 deletion

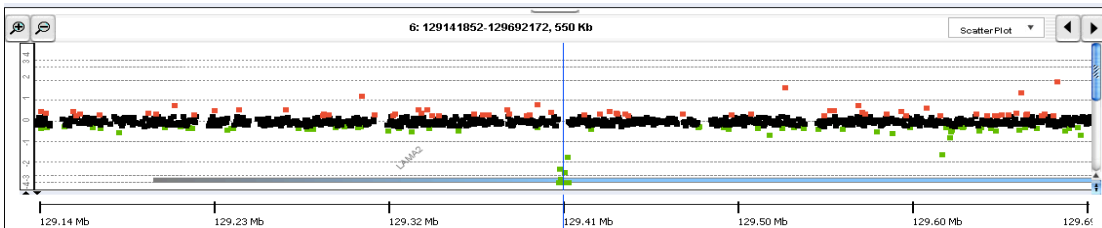

(continuing)

P9: *LAMA2* Exon4 deletion

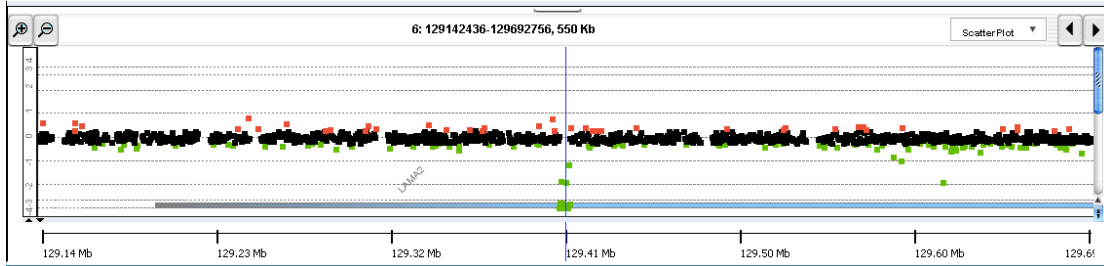

P10: *LAMA2* Exon4 deletion

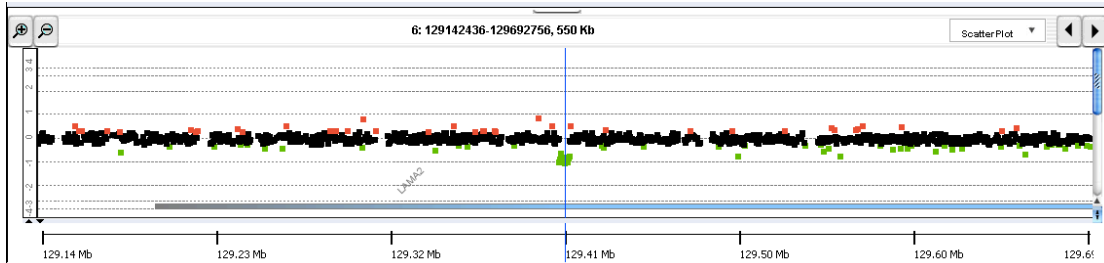

P11: *LAMA2* Exon4 deletion

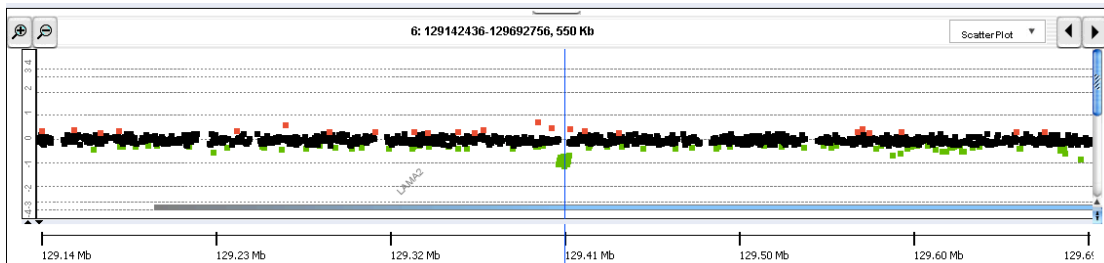

P15: *LAMA2* Exon5 deletion

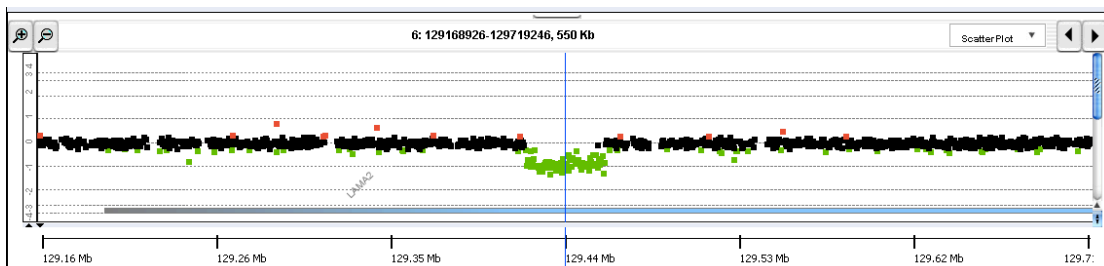

P17: *LAMA2* Exon10-12 deletion

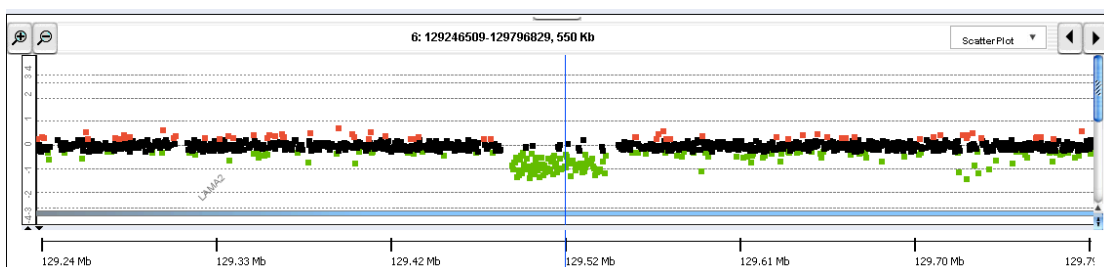

P21: *LAMA2* Exon36-65 deletion

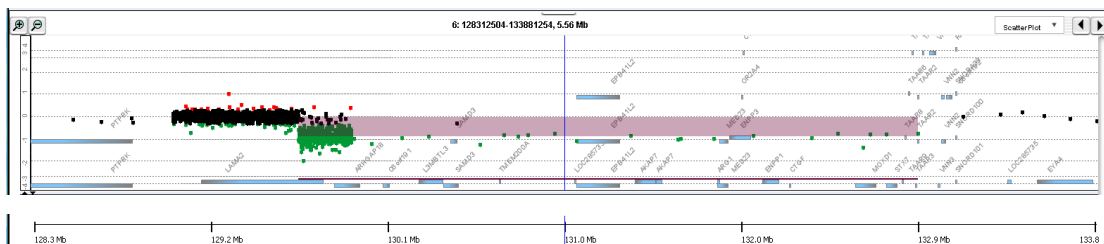

(continuing)

P22: *LAMA2* Exon41-47 deletion

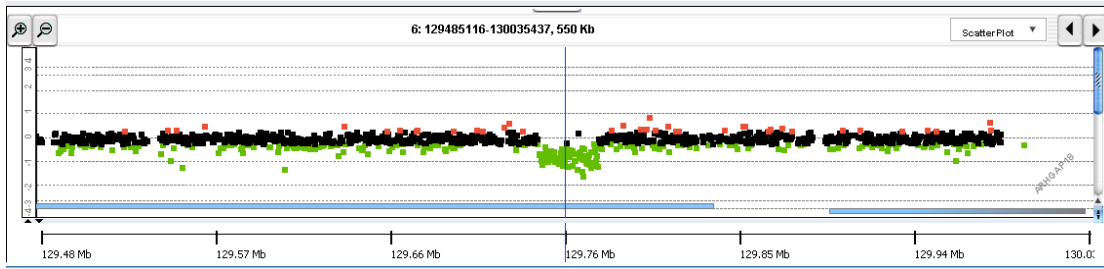

P23: *LAMA2* Exon49 deletion

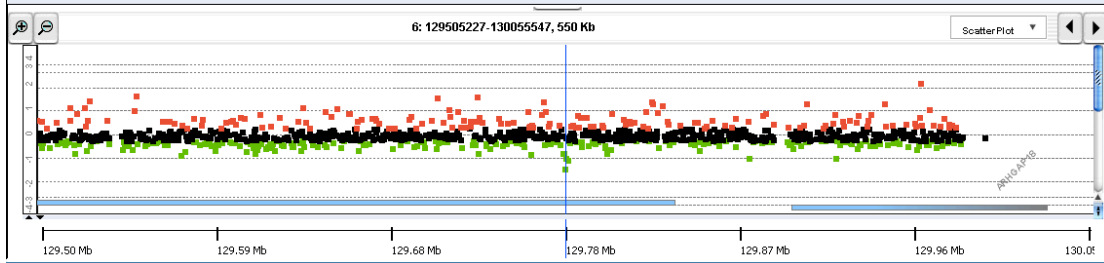

P26: *LAMA2* Exon59-63 deletion

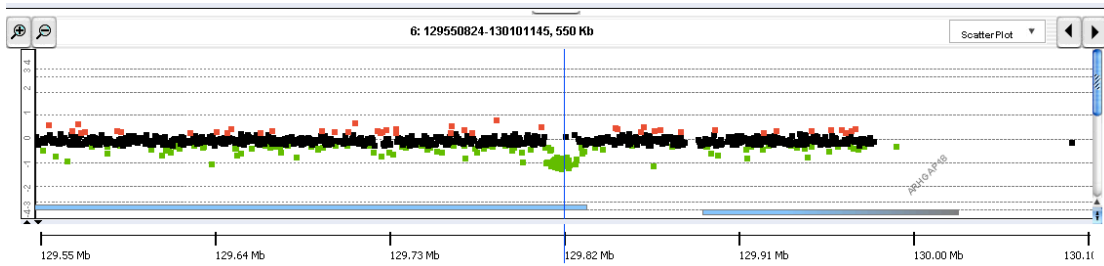

P29: No CNV detected

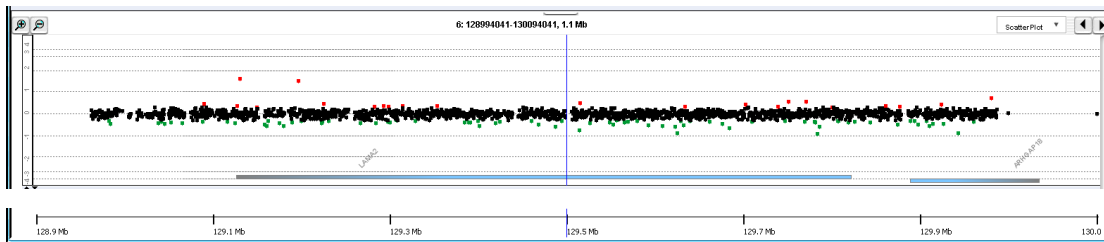

(end)

**Figure S1.** High-resolution aCGH results of 16 subjects with *LAMA2* MD.

The X-axis represents the chromosome location, while the Y-axis represents the normalized log<sub>2</sub> Cy5(patient)/Cy3(healthy control) fluorescence intensity thresholds -1 (loss) and 1 (gain), respectively. Each point represents an oligonucleotide probe. Array CGH results revealed gains (in red) and/or losses (in green) of small chromosomal regions. Copy-number sizes were measured by the distance between the position of the first and last oligonucleotide probes included in the algorithmically determined region of aberration, respectively.

P2: *LAMA2* Exon1 deletion

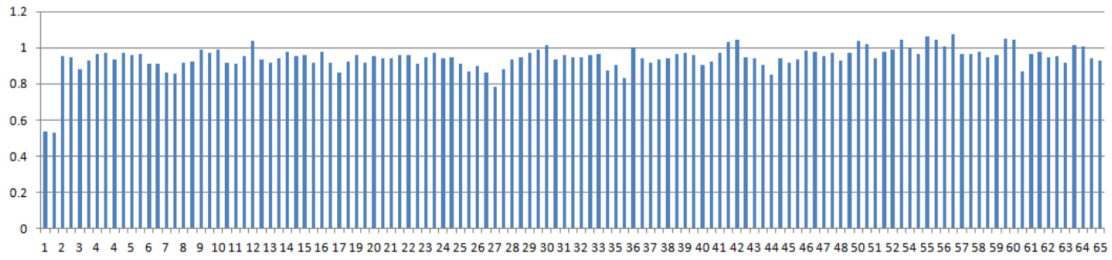

P5: *LAMA2* Exon2-12 deletion

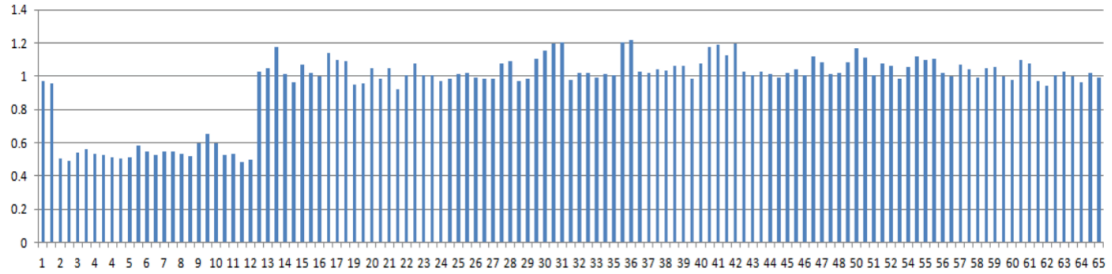

P16: *LAMA2* Exon5-8 duplication

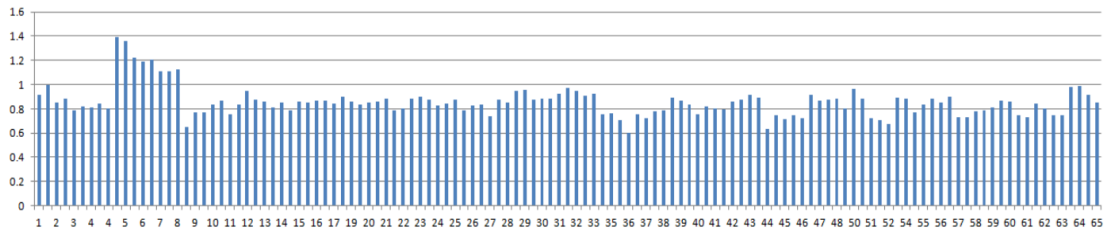

P17: *LAMA2* Exon10-12 deletion

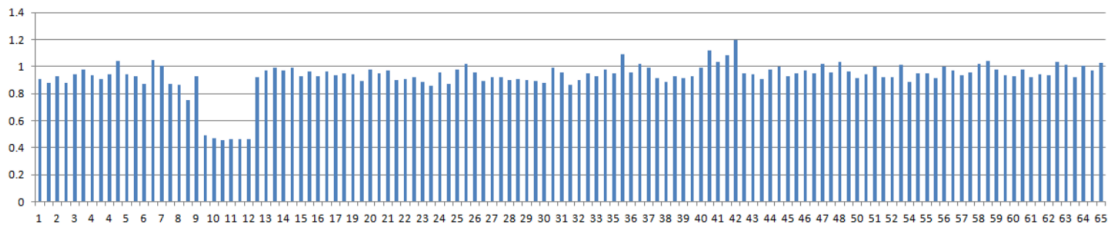

P18: *LAMA2* Exon13-14 deletion

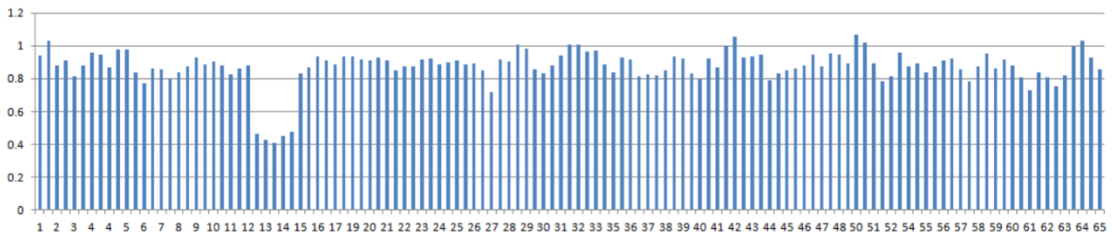

P19: *LAMA2* Exon20 deletion

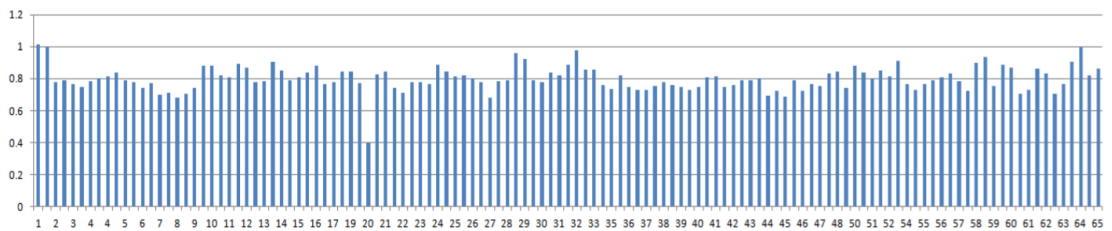

P20: *LAMA2* Exon30 deletion

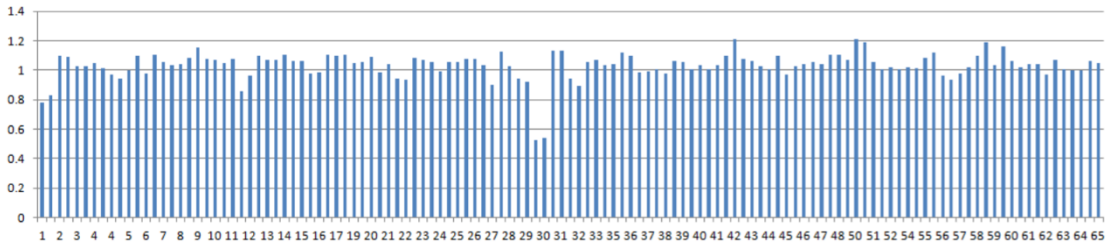

(continuing)

P21: *LAMA2* Exon36-65 deletion

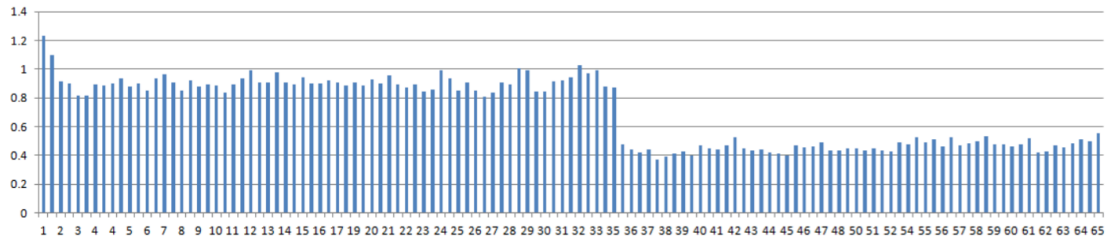

P23: *LAMA2* Exon49 deletion

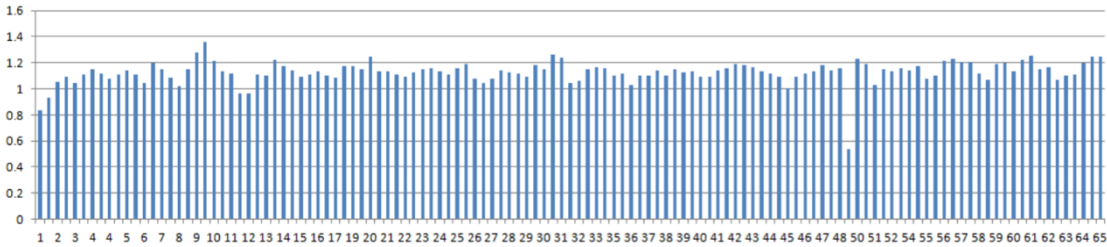

P24: *LAMA2* Exon49 deletion

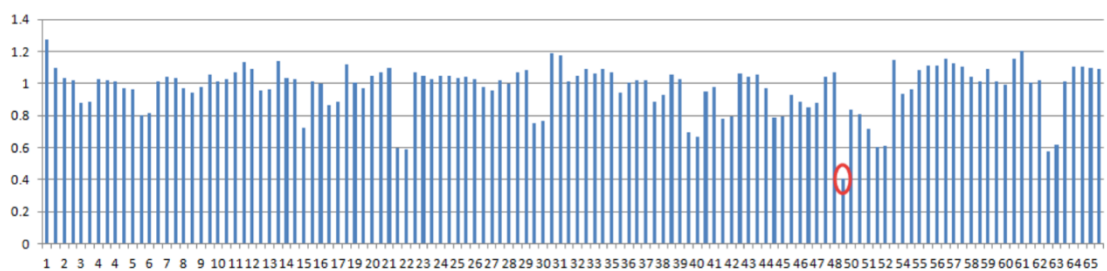

P25: *LAMA2* Exon49-57 deletion

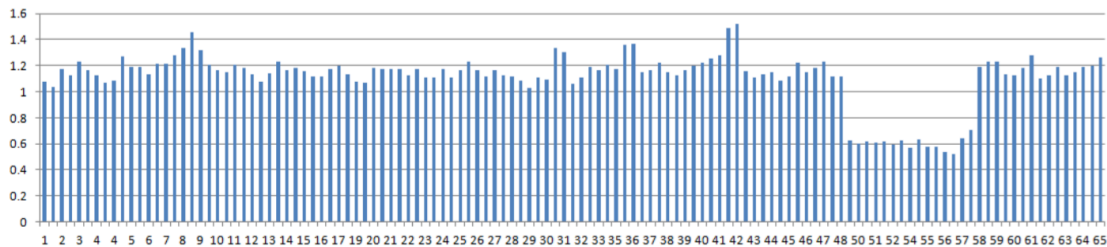

P27: *LAMA2* Exon59-63 deletion

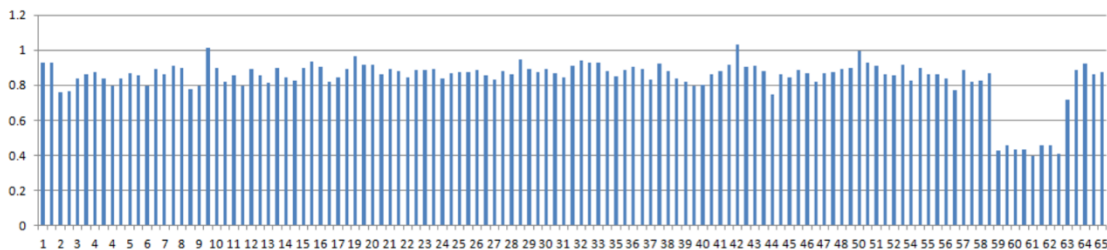

P28: *LAMA2* Exon59-63 deletion

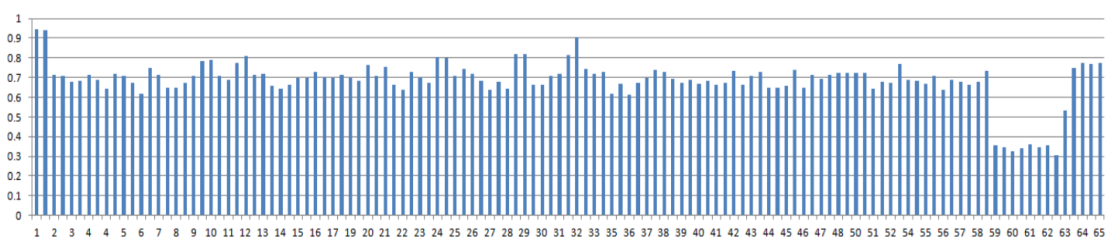

P29: No CNV detected

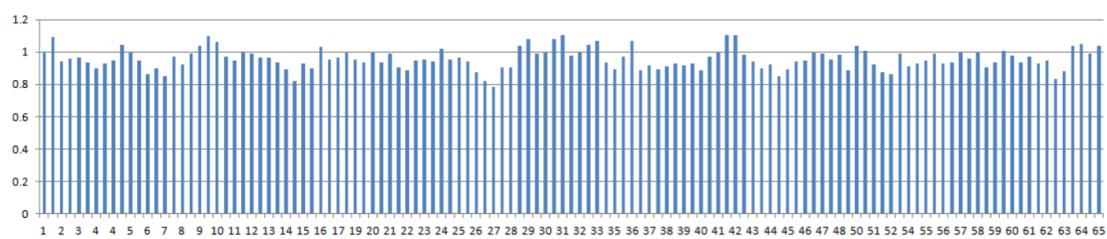

(end)

**Figure S2.** Next-generation sequencing results of 14 subjects with *LAMA2* MD. The X-axis represents each *LAMA2* exon location, while the Y-axis represents the normalized ratio of sample reads to reference reads. Variants of copy number were speculated using the read-depth method. In brief, the ratio of sample reads to reference reads from control sample was calculated. Horizontal lines at 0.75 or 1.25 were used to highlight the thresholds using to call CNVs. The deficiency of CNV was defined, when the ratio was less than 0.75, while the amplification was defined, when the ratio was more than 1.25. The CNVs of whole *LAMA2* gene and exon regions were calculated respectively.

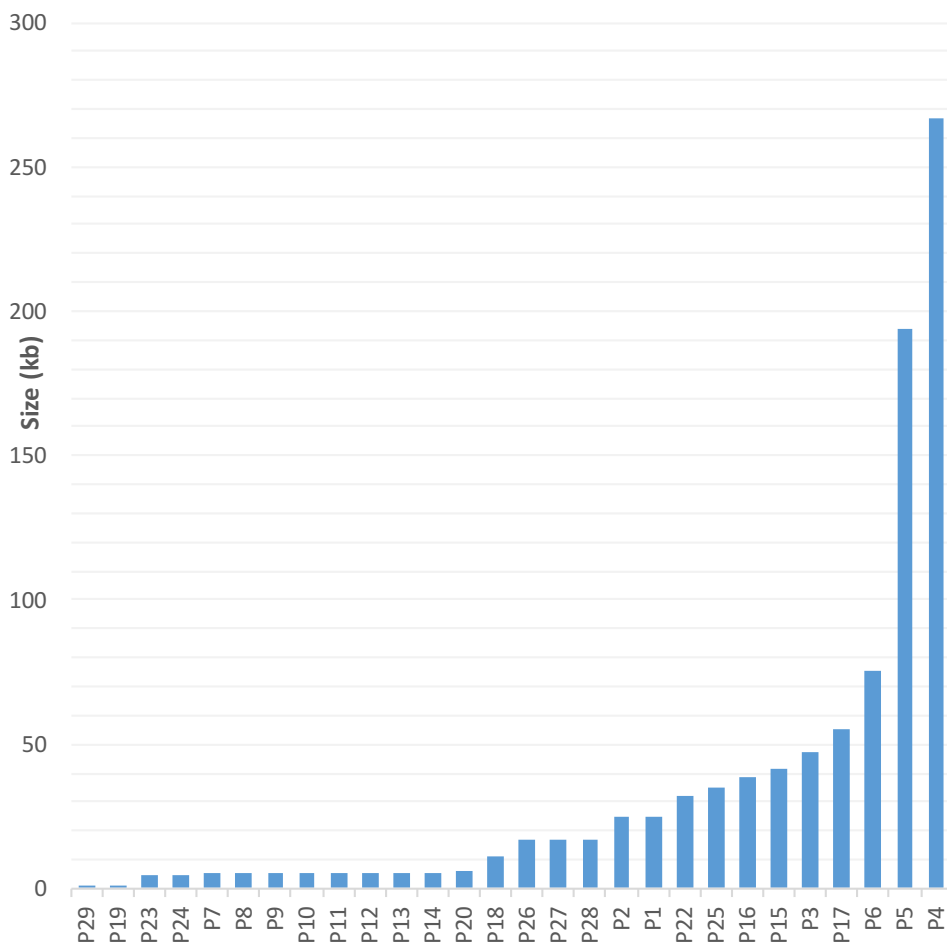

**Figure S3.** Size of *LAMA2* intragenic CNVs. *LAMA2* intragenic CNVs are plotted in ascending size order. Most *LAMA2* CNVs are small (median size is 14.3 kb).

## P1

Chr6:129187614 TAAATTA AAA TGCATGTATA GGAAATGTAA ACA  
 P1 TAAATTA AAA TGCATGTATA GGAAATGTAA ACATG TGGTATACCA AATTCAGTTG AGACTGTTTG  
 Chr6:129212825 CATG TGGTATACCA AATTCAGTTG AGACTGTTTG

## P2

Chr6:129185274 TCTTTGAGCT CCTAAAAAAA GAGCCTCATG TTCTT  
 P2 TCTTTGAGCT CCTAAAAAAA GAGCCTCATG TTCTT ATCATGGTGA AGCTCAGATG TGTCTTTGTA  
 Chr6:129210133 TCTT ATCATGGTGA AGCTCAGATG TGTCTTTGTA

## P3

Chr6:129355400 ATCTGAGGTA GTGTAGTCAA CTCTAATTTA TTAA  
 P3 ATCTGAGGTA GGGTAGTCAA CTCTAATTTA TTAAT GTAAATGACG AGTTAATGGA TGCAGCACAC  
 Chr6:129402431 TAAT GTAAATGACG AGTTAATGGA TGCAGCACAC

## P4

Chr6:129221761 TGTAAGATCA TGGATTCTCG AACACAGGA  
 P4 TGTAAGATCA TGGATTCTCG AACACAGGAAT CTAGATCCCT GAGGAATCGC CACACTGTCT TCCAC  
 Chr6:129488858 T CTAGATCCCT GAGGAATGGC CACACTGACT TCCAC

## P5

Chr6:129354670 TTTTTATTTT TTGAATTATT AACTGCAGAC AA  
 P5 TTTTTATTTT TTGAATTATT AACTGCAGAC AA CTTCATTCTT TTGGAGGAGG AGAGGCGCTC TGA  
 Chr6:129548523 CTTCATTCTT TTGGAGGAGG AGAGGCGCTC TGA

## P6

Chr6:129379272 CA GCCTCCACTC CTGCC  
 Chr6:129454979 C TCGT AAAATACACA CACACACA  
 P6 CA GCCTCCACTC CTGCC TCGT AAAATACACA CACACACACA CTCCTGTACTCGTA AAATAC  
 Chr6:129379280 CA CTCCTG  
 Chr6:129454975 TGTACTCGTA AAATAC

## P7~P14

Chr6:129414950 GGGATTTTTT TAAGACACCA AGTTTGTAAAC AA  
 P14 GGGATTTTTT TAAGACACCA AGTTTGTAAAC AATGCTGAAA TGCACACTAA GTACTCTGTG CTA  
 Chr6:129420432 AAC AATGCTGAAA TGCACACTAA GTACTCTGTG CTA

## P15

Chr6:129423519 ATCTGCCAC CTTGGCCTCC CAAAGTGCTA GGAT  
 P15 ATCTGCCAC CTTGGCCTCC CAAAGTGCTA GGATGAATCAT ATTAGAGCCT ACAAATGATA TCCC  
 Chr6:129465235 GATGAATCAT ATTAGAGCCT ACAAATGATA TCCC

## P16

Chr6:129440069 ATAGCAGTAT AGCATACTGA AAGTTTGTG  
 P16 CCTCAC GCATATCTTC GTATGACGGA TCACTCGGTATAGCAGTAT AGCATACTGA AAGTTTGTG  
 Chr6:129478850 CCTCAC GCATATCTTC GTATGACGGA TCACTCGGTA

## P17

Chr6:129488370 TATGTATACA TGTGCC LIP2  
 P17 TATGTATACA TGTGCC ATAAT ATATTAGTAT CATAACACAT GTGTATAATA C  
 Chr6:129544038 LIP5 ATAAT ATATTAGTAT CATAACACAT GTGTATAATA C



## P18

Chr6:129566754 **TGTTAGAATT TTTCAATGAA TGTTAATGGA TGA**  
|||||  
P18 **TGTTAGAATT TTTCAATGAA TGTTAATGGA TGA**AGCAT TTGACTTAGT TGACAATTCT TTGATAGCT  
|||||  
Chr6:129578227 AGCAT TTGACTTAGT TGACAATTCT TTGATAGCT

## P19

Chr6:129612157 **CACAA AACCGGCACA CAGTAAATCA TTAATCA**  
|||||  
P19 **CACAA AACCGGCACA CAGTAAATCA TTAATCA**AACACC TTCTTCTAGT TCCATCATT AAAAGC  
|||||  
Chr6:129613535 AACACC TTCTTCTAGT TCCATCATT AAAAGC

## P20

Chr6:129658398 **TATAAGATCC AAATCAAGGG AGGAAGTACA**  
|||||  
P20 **TATAAGATCC AAATCAAGGG AGGAAGTACA**CTATAATAAA AGCTACAGGA GAT  
|||||  
Chr6:129664812 **AGTACA**CTATAATAAA AGCTACAGGA GAT

## P22

Chr6:129746490 **TTTCACTGTT GTTTGGGC**  
|||||  
Chr6:129775772 |||||GCACCATTATTGCTTGTCTTTTGTGTACACA.....  
|||||  
P22 **TTTCACTGTT GTTTGGGC**ACCATTATTGCTTGTCTTTTGTGTACACAGCTCCTCCTT TAGTCTACATA  
GCCACCATAGAAAAATGCAGTTTCAAAACACTGAAATTCCTATGTAACATACCAGGTCCACCCTACTA  
AAATGGGAAGTAACAGTGAAGTATTCTATCTTTGGAGCTTAATGCAATTATCAACATT  
AGTACCATATATTAATTACTTATAGAAGTATCCCTGTCTTCAGCACTCCCTCCCATTTCTCTTTGTT  
TTCCCAATTCTCAACTCCCTGTAAACCCAAAGCAGCTAAACCCAAAACCTCCCTGTAAACCCAAA  
CAGCCTATTTTA TAAGGGCACT |||||  
Chr6:129776052 |||||TAAACCCAAA|||  
Chr6:129776042 |||||AACTCCCTGTAAACCCAAAAG  
CAGC |||||  
Chr6:129779042 |||||CCTATTTTA TAAGGGCACT

## P23~P24

Chr6:129778315 **AATGTGAAAA GCCAGGGTGA CCCCAAATTT AT**  
|||||  
P23 **AATGTGAAAA GCCAGGGTGA CCCCAAATTT AT**TAGTAAAA TTCTTTCAAT ACATGAAAGA CAGTG  
|||||  
Chr6:129782637 GTAAAA TTCTTTCAAT ACATGAAAGA CAGTG

## P25

Chr6:129778243 **GCAGG AGCACAACCA AATATAATGG ATAA**  
|||||  
P25 **GCAGG AGCACAACCA AATATAATGG ATAA**ATCTTC AATTAGACT GAGAAAAGCA CACTAATGG  
|||||  
Chr6:129813338 ATCTTC AACTTAGACT GAGAAAAGCA CACTAATGG

## P26~P28

Chr6:129816341 **ACTTCTATGT AATGATTGTA TTTCTATAGG CAAA**  
|||||  
P26 **ACTTCTATGT AATGATTGTA TTTCTATAGG**CAAAAAATGG ATGGAATGGG TATTGAAATG  
|||||  
Chr6:129833597 CAAAAAATGG ATGGAATGGG TATTGAAATG

(End)

**Figure S4.** Junction fragment sequencing of *LAMA2* intragenic CNVs. The “upstream” (above) and “downstream” (below) reference sequences are aligned with sequence obtained from breakpoint PCR product (middle). The microhomology at the junction sites was annotated with red color, FoSTeS/MMBIR sequences were annotated with purple color, single- or oligo-nucleotide changes near breakpoints were annotated with green color, and inserted sequences between breakpoints were highlighted in gray color. The genomic coordinates were annotated next to the reference sequences GRCh37/hg19.

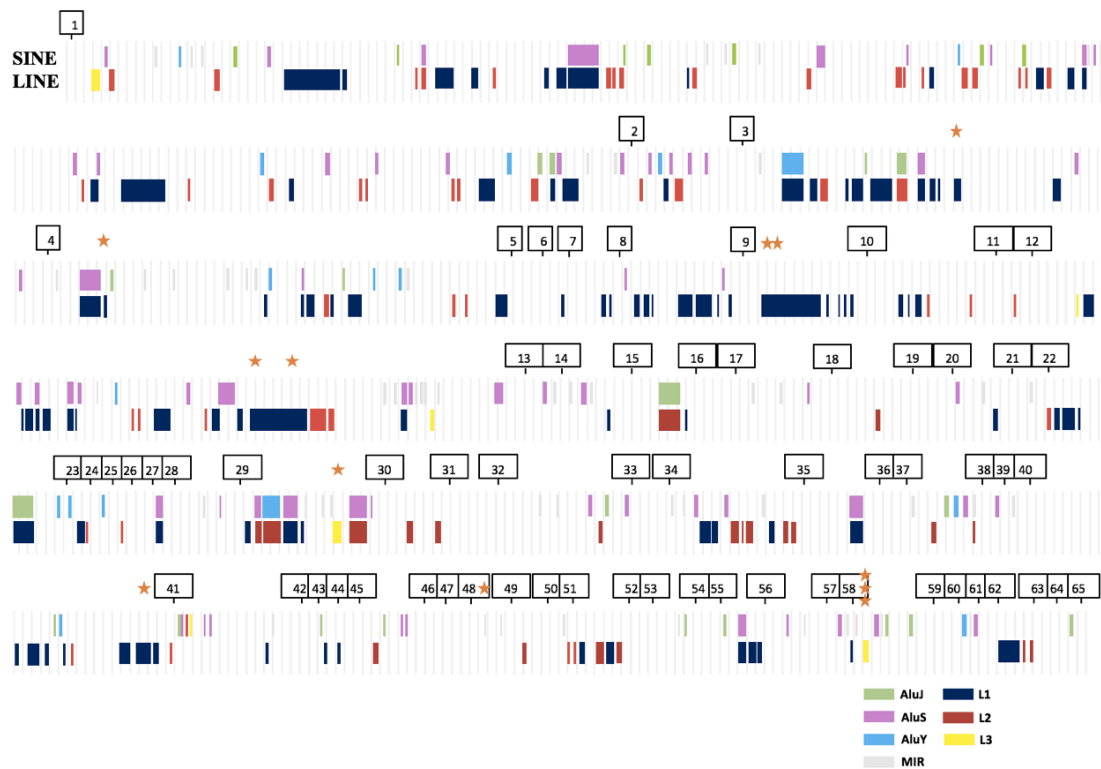

**Figure S5.** The Repetitive-Element Distribution within LAMA2. Overall, 96 *Alu* and 83 L1 elements > 100bp in size are present throughout the *LAMA2* non-coding region, and these highly homologous repetitive elements might mediate NAHR in various combinations. Exon numbers are shown in squares. The asterisks represent the likely NAHR events mediated by these repetitive elements and observed in this study. These *Alu* and L1 elements do not demonstrate equal recombination ability, none of *Alu* elements contribute to any recombination in this study. L1P2 (chr6: 129488385-129494343) and L1P5 (chr6: 129543585-129549735) have contributed LINE-LINE recombination

**Table S1:** Primers used to characterize the *LAMA2* CNVs

| Subject | PCR Product (kb) | Primer  | PCR Primer Position (Chr6/GRCh37/hg19) | PCR Primer Sequence 5'-3'  |
|---------|------------------|---------|----------------------------------------|----------------------------|
| P1      | ~0.9             | Forward | 129187300-129187323                    | TAAGGGCACATAGTCTGTATCTCA   |
|         |                  | Reverse | 129213316-129213339                    | TAGTCTCTTAGGGTCTCCTCAAAG   |
| P2      | ~6.9             | Forward | 129179401-129179425                    | AGGTTCACTGCTACAGATTAGTCCA  |
|         |                  | Reverse | 129211015-129211038                    | CGTGTCCAAATAAAATCCAAATAG   |
| P3      | ~0.8             | Forward | 129354952-129354976                    | AGTCTATTTCTCTCCAAGTCCACC   |
|         |                  | Reverse | 129402738-129402762                    | AATCTTTCTCAAATCTCCAGCACA   |
| P4      | ~7.1             | Forward | 129220509-129220533                    | TGGCAGAGAACTAGAAGGGTATTTA  |
|         |                  | Reverse | 129494620-129494644                    | TGGTGAAGAATGTAGGGATGATAGT  |
| P5      | ~2.0             | Forward | 129354335-129354359                    | GCCCTGAGGAACGATAATAGTACT   |
|         |                  | Reverse | 129550068-129550092                    | CATAAGAGGAGCATCAGTCAATCAA  |
| P6      | ~1.4             | Forward | 129378242-129378265                    | GCATTGAGGACTTAGTTTTGCTTT   |
|         |                  | Reverse | 129455281-129455305                    | GTGAGACGGAACAATCAGTACACTT  |
| P7~14   | ~1.4             | Forward | 129413934-129413958                    | CTCCATAGAGAGTGACCTTCATTA   |
|         |                  | Reverse | 129420804-129420828                    | TTTTCCCTAGAAGTGTTGAGAGATA  |
| P15     | ~2.0             | Forward | 129422393-129422417                    | GAAAACCAGCAACAAGTCTTATCTC  |
|         |                  | Reverse | 129466069-129466092                    | TAGAAGGTAGACAGGAGGAAGCAC   |
| P16     | ~5.0             | Forward | 129475774-129475797                    | CACTGCTGGTATAAACTGCGAGAC   |
|         |                  | Reverse | 129441267-129441290                    | GGCTGGAATATCTTAAAATCTGCT   |
| P17     | ~6.4             | Forward | 129488245-129488269                    | CCTATTTATCCCAGTCTTACTTCCA  |
|         |                  | Reverse | 129549827-129549851                    | GAACAGGAGTCTTTAGAGTTTGGTT  |
| P18     | ~2.5             | Forward | 129565243-129565267                    | CGACACCTACAAGTCTGGTTCATTT  |
|         |                  | Reverse | 129579148-129579172                    | GGACGGATGGGTAGATAGACAGATA  |
| P19     | ~1.4             | Forward | 129611331-129611355                    | ACTCCAAGAAAAAGTGACTCCTAAA  |
|         |                  | Reverse | 129614037-129614060                    | CCTGATTTACAGACACATCTTCCT   |
| P20     | ~2.1             | Forward | 129657273-129657296                    | CTGTGGAAAAAATAAACAGTGCTC   |
|         |                  | Reverse | 129665759-129665782                    | AACATTAGCCTGGGAAATCTTATC   |
| P22     | ~0.9             | Forward | 129746435-129746459                    | TAGTCATCTCTGGTCATAGTCCCTC  |
|         |                  | Reverse | 129779575-129779599                    | CATATTCTGGTGTGGCAGTAGTCTT  |
| P23~24  | ~1.7             | Forward | 129777476-129777500                    | GAAGAACTGGGAGAAATGGAAGTAT  |
|         |                  | Reverse | 129783427-129783451                    | GCTATGTTGGTTTACTTTGGATTCA  |
| P25     | ~2.6             | Forward | 129777654-129777678                    | CTCCTCCTGTTTATTTTCATCTTTGT |

|        |      |         |                     |                           |
|--------|------|---------|---------------------|---------------------------|
|        |      | Reverse | 129815265-129815289 | TGTAGTGACTGTGACCATCTTTGTT |
| P26~28 | ~0.9 | Forward | 129815973-129815997 | TCACCCTCATATACCTGAAAATCAT |
|        |      | Reverse | 129834033-129834057 | CTTCTAAGAGATGCCTAGCCTGTTA |
| P29    | ~1.9 | Forward | 129832777-129832801 | TGATACTCAGTTCAGTTGGTGTGGT |
|        |      | Reverse | 129834759-129834783 | CATTAGTCAGTTTGGCAAGACATTC |

**Table S2.** Quality control of next-generation sequencing results of 14 subjects with *LAMA2* MD.

| Subject | Initial bases on target | Base covered on target | Coverage of target region | Effective bases on target | Average sequencing depth on target | Fraction of target covered with at least 4X | Fraction of target covered with at least 10X | Fraction of target covered with at least 20X | chip       |
|---------|-------------------------|------------------------|---------------------------|---------------------------|------------------------------------|---------------------------------------------|----------------------------------------------|----------------------------------------------|------------|
| P2      | 9351                    | 9351                   | 100.00%                   | 8864214                   | 947.94                             | 100.00%                                     | 100.00%                                      | 100.00%                                      | LAMA2_exon |
| P2      | 440494                  | 431238                 | 97.90%                    | 176527125                 | 400.75                             | 96.47%                                      | 94.83%                                       | 92.51%                                       | LAMA2      |
| P5      | 9351                    | 9351                   | 100.00%                   | 9444610                   | 1010.01                            | 100.00%                                     | 100.00%                                      | 100.00%                                      | LAMA2_exon |
| P5      | 440494                  | 430840                 | 97.81%                    | 189779201                 | 430.83                             | 96.25%                                      | 94.46%                                       | 92.11%                                       | LAMA2      |
| P17     | 9351                    | 9351                   | 100.00%                   | 9256155                   | 989.86                             | 100.00%                                     | 100.00%                                      | 100.00%                                      | LAMA2_exon |
| P17     | 440494                  | 432194                 | 98.12%                    | 192712115                 | 437.49                             | 96.57%                                      | 95.32%                                       | 93.22%                                       | LAMA2      |
| P18     | 9351                    | 9351                   | 100.00%                   | 9098833                   | 973.03                             | 100.00%                                     | 100.00%                                      | 100.00%                                      | LAMA2_exon |
| P18     | 440494                  | 429642                 | 97.54%                    | 177472354                 | 402.89                             | 95.84%                                      | 93.99%                                       | 91.33%                                       | LAMA2      |
| P20     | 9351                    | 9351                   | 100.00%                   | 10343359                  | 1106.12                            | 100.00%                                     | 100.00%                                      | 100.00%                                      | LAMA2_exon |
| P20     | 440494                  | 430974                 | 97.84%                    | 212452691                 | 482.31                             | 96.37%                                      | 95.01%                                       | 92.83%                                       | LAMA2      |
| P21     | 9351                    | 9351                   | 100.00%                   | 7251961                   | 775.53                             | 100.00%                                     | 100.00%                                      | 100.00%                                      | LAMA2_exon |
| P21     | 440494                  | 431634                 | 97.99%                    | 164570604                 | 373.6                              | 96.44%                                      | 94.96%                                       | 92.54%                                       | LAMA2      |
| P25     | 9351                    | 9351                   | 100.00%                   | 10886809                  | 1164.24                            | 100.00%                                     | 100.00%                                      | 100.00%                                      | LAMA2_exon |
| P25     | 440494                  | 432057                 | 98.08%                    | 238270083                 | 540.92                             | 96.88%                                      | 95.91%                                       | 94.42%                                       | LAMA2      |
| P27     | 9351                    | 9351                   | 100.00%                   | 8546247                   | 913.94                             | 100.00%                                     | 100.00%                                      | 100.00%                                      | LAMA2_exon |
| P27     | 440494                  | 431254                 | 97.90%                    | 173276987                 | 393.37                             | 96.40%                                      | 94.62%                                       | 92.35%                                       | LAMA2      |
| P28     | 9351                    | 9351                   | 100.00%                   | 6981800                   | 746.64                             | 100.00%                                     | 100.00%                                      | 100.00%                                      | LAMA2_exon |
| P28     | 440494                  | 430297                 | 97.69%                    | 139077389                 | 315.73                             | 95.80%                                      | 93.76%                                       | 90.89%                                       | LAMA2      |
| P29     | 9351                    | 9351                   | 100.00%                   | 9683154                   | 1035.52                            | 100.00%                                     | 100.00%                                      | 100.00%                                      | LAMA2_exon |
| P29     | 440494                  | 431123                 | 97.87%                    | 194115393                 | 440.68                             | 96.65%                                      | 95.21%                                       | 93.30%                                       | LAMA2      |
| P24     | 9351                    | 9351                   | 100.00%                   | 9930144                   | 1061.93                            | 100.00%                                     | 100.00%                                      | 100.00%                                      | LAMA2_exon |
| P24     | 440494                  | 432005                 | 98.07%                    | 193655976                 | 439.63                             | 96.76%                                      | 95.36%                                       | 93.21%                                       | LAMA2      |
| P23     | 9351                    | 9351                   | 100.00%                   | 11307700                  | 1209.25                            | 100.00%                                     | 100.00%                                      | 100.00%                                      | LAMA2_exon |
| P23     | 440494                  | 431853                 | 98.04%                    | 230970596                 | 524.34                             | 96.62%                                      | 95.39%                                       | 93.34%                                       | LAMA2      |
| P19     | 9351                    | 9351                   | 100.00%                   | 8220763                   | 879.13                             | 100.00%                                     | 100.00%                                      | 100.00%                                      | LAMA2_exon |
| P19     | 440494                  | 429875                 | 97.59%                    | 160900770                 | 365.27                             | 95.89%                                      | 94.03%                                       | 91.13%                                       | LAMA2      |
| P16     | 9351                    | 9351                   | 100.00%                   | 8843356                   | 945.71                             | 100.00%                                     | 100.00%                                      | 100.00%                                      | LAMA2_exon |
| P16     | 440494                  | 428891                 | 97.37%                    | 168930680                 | 383.5                              | 0.953                                       | 0.9316                                       | 0.9013                                       | LAMA2      |
